# Supplementary material for: Altered miRNA profile in testis of post-cryptorchidopexy patients with non-obstructive azoospermia
Source: Reprod Biol Endocrinol. 2018 Aug 13;16:78. doi: 10.1186/s12958-018-0393-3 (PMC6090726; doi:10.1186/s12958-018-0393-3)
Supplement: Supplementary file 1 — Primers used for the quantification of representative deregulated miRNAs. (XLS 23 kb) [file 12958_2018_393_MOESM1_ESM.xls]

## Sheet: Sheet1
Table S1. Primers used for the quantification of representative deregulated miRNAs.
miRNA Name	Reverse Transcript stem-loop primer	Gene specific primer for Real-time PCR	Universal primer
hsa-miR-142-3p	GTCGTATCCAGTGCAGGGTCCGAGGTATTCGCACTGGATACGACTCCATA	CACGCATGTAGTGTTTCC	CCAGTGCAGGGTCCGAGGTA
hsa-miR-409-3p	GTCGTATCCAGTGCAGGGTCCGAGGTATTCGCACTGGATACGACAGGGGT	CACGCAGAATGTTGCTCG	CCAGTGCAGGGTCCGAGGTA
hsa-miR-299-5p	GTCGTATCCAGTGCAGGGTCCGAGGTATTCGCACTGGATACGACATGTAT	CACGCATGGTTTACCGTC	CCAGTGCAGGGTCCGAGGTA
hsa-miR-199a-3p	GTCGTATCCAGTGCAGGGTCCGAGGTATTCGCACTGGATACGACTAACCA	CACGCAACAGTAGTCTGC	CCAGTGCAGGGTCCGAGGTA
hsa-miR-449a	GTCGTATCCAGTGCAGGGTCCGAGGTATTCGCACTGGATACGACACCAGC	CACGCATGGCAGTGTATT	CCAGTGCAGGGTCCGAGGTA
hsa-miR-512-5p	GTCGTATCCAGTGCAGGGTCCGAGGTATTCGCACTGGATACGACGAAAGT	CACGCACACTCAGCCTTG	CCAGTGCAGGGTCCGAGGTA
hsa-miR-182-5p	GTCGTATCCAGTGCAGGGTCCGAGGTATTCGCACTGGATACGACAGTGTG	CACGCATTTGGCAATGGT	CCAGTGCAGGGTCCGAGGTA
hsa-miR-138-5p	GTCGTATCCAGTGCAGGGTCCGAGGTATTCGCACTGGATACGACCGGCCT	CACGCAAGCTGGTGTTGT	CCAGTGCAGGGTCCGAGGTA
hsa-miR-22-3p	GTCGTATCCAGTGCAGGGTCCGAGGTATTCGCACTGGATACGACACAGTT	CACGCAAAGCTGCCAGTT	CCAGTGCAGGGTCCGAGGTA
hsa-miR-214-3p	GTCGTATCCAGTGCAGGGTCCGAGGTATTCGCACTGGATACGACACTGCC	CACGCAACAGCAGGCACA	CCAGTGCAGGGTCCGAGGTA
hsa-miR-376c-3p	GTCGTATCCAGTGCAGGGTCCGAGGTATTCGCACTGGATACGACACGTGG	CACGCAAACATAGAGGAA	CCAGTGCAGGGTCCGAGGTA
hsa-miR-34c-5p	GTCGTATCCAGTGCAGGGTCCGAGGTATTCGCACTGGATACGACGCAATC	CACGCAAGGCAGTGTAGT	CCAGTGCAGGGTCCGAGGTA
18S	GAATCGAACCCTGATTCCCCGTC	fw CGGCGACGACCCATTCGAAC	rw GAATCGAACCCTGATTCCCCGTC
