# Supplementary material for: Altered miRNA profile in testis of post-cryptorchidopexy patients with non-obstructive azoospermia
Source: Reprod Biol Endocrinol. 2018 Aug 13;16:78. doi: 10.1186/s12958-018-0393-3 (PMC6090726; doi:10.1186/s12958-018-0393-3)
Supplement: Supplementary file 5 — A collection of all the upregulated known miRNAs detected by deep sequencing in cryptorchid tissues. (XLS 35 kb) [file 12958_2018_393_MOESM5_ESM.xls]

## Sheet: Sheet1
Table S3. A collection of all the upregulated known miRNAs detected by deep sequencing in cryptorchid tissues
MiRNA name	baseMean	log2FoldChange	lfcSE	stat	p	p adj
hsa-miR-7151-3p	6.02594	2.63382	0.891908	2.95302	0.00314686	0.0137049
hsa-miR-376a-2-5p	10.918	2.20234	0.723842	3.04258	0.00234562	0.0108905
hsa-miR-1224-5p	17.7081	2.1926	0.615068	3.56481	0.000364118	0.00239085
hsa-miR-1299	187.854	1.95841	0.425713	4.60032	4.22e-06	5.73e-05
hsa-miR-142-5p	697.547	1.89769	0.582949	3.25533	0.00113259	0.0060123
hsa-miR-543	1281.56	1.86925	0.450161	4.15241	3.29e-05	0.000356384
hsa-miR-487a-3p	80.5638	1.86486	0.591151	3.15463	0.00160701	0.00786552
hsa-miR-584-3p	19.6657	1.82968	0.562267	3.25411	0.0011375	0.00602336
hsa-miR-665	18.4158	1.79871	0.709573	2.53492	0.0112473	0.0362017
hsa-miR-134-3p	29.5409	1.77799	0.597694	2.97475	0.0029323	0.0130094
hsa-miR-369-3p	500.851	1.69174	0.431978	3.91625	8.99e-05	0.000820194
hsa-miR-377-3p	96.2445	1.66537	0.550941	3.02277	0.00250469	0.0113002
hsa-miR-33a-5p	28.1029	1.66458	0.550215	3.02532	0.00248374	0.0112772
hsa-miR-376a-3p	112.073	1.60222	0.432532	3.70428	0.000211988	0.00155458
hsa-miR-758-3p	520.13	1.58923	0.438968	3.62038	0.000294176	0.00200227
hsa-miR-654-3p	4175.57	1.58789	0.387757	4.09506	4.22e-05	0.000442992
hsa-miR-134-5p	2747.86	1.55827	0.424038	3.67484	0.000237999	0.00168063
hsa-miR-889-3p	740.361	1.55183	0.468576	3.31181	0.000926952	0.00516479
hsa-miR-127-3p	40871.6	1.54858	0.391533	3.95517	7.65e-05	0.000706535
hsa-miR-1185-1-3p	161.457	1.53912	0.506445	3.03907	0.00237309	0.0109852
hsa-miR-1185-2-3p	38.5408	1.53419	0.586835	2.61435	0.00893984	0.0304761
hsa-miR-154-5p	267.267	1.51636	0.345763	4.38554	1.16e-05	0.000140283
hsa-miR-381-3p	7512.42	1.51073	0.381735	3.95755	7.57e-05	0.000702586
hsa-miR-127-5p	768.176	1.51054	0.401182	3.76522	0.000166405	0.00127279
hsa-miR-337-5p	44.57	1.51015	0.439376	3.43703	0.000588134	0.00357344
hsa-miR-379-3p	262.022	1.50795	0.401391	3.75681	0.000172092	0.00131159
hsa-miR-136-3p	937.135	1.50593	0.389325	3.86805	0.000109711	0.000955609
hsa-miR-376c-3p	327.216	1.49234	0.401905	3.71317	0.000204679	0.00152722
hsa-miR-495-3p	884.797	1.44346	0.390486	3.69658	0.00021852	0.00159699
hsa-miR-376b-5p	24.8285	1.44186	0.589624	2.44539	0.0144697	0.0448815
hsa-miR-487b-3p	725.073	1.44148	0.396064	3.63951	0.000273156	0.00189258
hsa-miR-142-3p	271.745	1.4377	0.531608	2.70445	0.00684183	0.0249789
hsa-miR-382-5p	1469.45	1.4301	0.418472	3.41743	0.000632147	0.00375766
hsa-miR-136-5p	325.048	1.42876	0.484253	2.95044	0.00317319	0.0137355
hsa-miR-206	24.9753	1.42307	0.579348	2.45634	0.0140362	0.0438554
hsa-miR-193b-3p	1081.05	1.41453	0.363963	3.88646	0.000101718	0.000896966
hsa-miR-708-3p	160.682	1.4112	0.34862	4.04795	5.17e-05	0.000515231
hsa-miR-432-5p	406.817	1.38475	0.409226	3.38384	0.000714805	0.00412269
hsa-miR-365a-5p	97.0276	1.38124	0.473081	2.91968	0.00350395	0.0149549
hsa-miR-188-5p	44.9232	1.37558	0.39792	3.45693	0.00054637	0.00337958
hsa-miR-493-3p	1719.52	1.36767	0.419981	3.25651	0.00112793	0.00600248
hsa-miR-539-3p	125.375	1.35959	0.529391	2.56822	0.0102222	0.0339283
hsa-miR-382-3p	554.289	1.3591	0.395497	3.43643	0.000589434	0.00357344
hsa-miR-485-5p	311.419	1.35676	0.4755	2.85333	0.00432638	0.0174198
hsa-miR-410-3p	168.008	1.35246	0.425941	3.17524	0.00149711	0.00752555
hsa-miR-493-5p	3539.03	1.35001	0.404469	3.33775	0.000844607	0.00478088
hsa-miR-299-5p	408.546	1.33991	0.401015	3.3413	0.000833858	0.00474521
hsa-miR-299-3p	190.47	1.3379	0.40432	3.30901	0.000936258	0.00518068
hsa-miR-708-5p	646.338	1.3343	0.334927	3.98387	6.78e-05	0.000640226
hsa-miR-455-5p	2333.57	1.32579	0.321964	4.11783	3.82e-05	0.00040605
hsa-miR-411-5p	6996.47	1.31401	0.375055	3.50352	0.000459148	0.00289154
hsa-miR-455-3p	461.866	1.30425	0.285718	4.56482	5e-06	6.71e-05
hsa-miR-409-5p	738.069	1.30356	0.431357	3.022	0.00251108	0.0113051
hsa-miR-409-3p	3889.97	1.30231	0.458098	2.84286	0.00447101	0.0177675
hsa-miR-411-3p	409.821	1.29969	0.354946	3.66166	0.000250587	0.00174756
hsa-miR-326	85.5971	1.28695	0.372671	3.4533	0.000553763	0.00340556
hsa-miR-376a-5p	38.1899	1.28103	0.502136	2.55117	0.0107362	0.0353021
hsa-miR-377-5p	130.689	1.27339	0.391687	3.25104	0.00114984	0.00605864
hsa-miR-337-3p	463.49	1.25736	0.353267	3.55925	0.000371916	0.00242712
hsa-miR-370-3p	3406.23	1.25439	0.434427	2.88746	0.0038837	0.0162506
hsa-miR-379-5p	7441.86	1.25402	0.379095	3.30792	0.000939918	0.00518291
hsa-miR-574-3p	3539.41	1.23431	0.303145	4.07168	4.67e-05	0.000472062
hsa-miR-369-5p	533.415	1.21351	0.434026	2.79595	0.00517482	0.0200783
hsa-miR-330-5p	80.4555	1.19978	0.395929	3.0303	0.0024431	0.0111733
hsa-miR-655-3p	121.416	1.19924	0.39051	3.07096	0.00213374	0.0100739
hsa-miR-329-3p	329.926	1.19549	0.3871	3.08833	0.00201286	0.00960951
hsa-miR-485-3p	171.127	1.17334	0.440114	2.66599	0.00767623	0.0273931
hsa-miR-503-3p	48.6319	1.16852	0.48121	2.42829	0.0151703	0.0465803
hsa-miR-214-5p	1320.32	1.15671	0.371487	3.11372	0.00184744	0.00900102
hsa-miR-3615	108.3	1.15665	0.410754	2.81593	0.00486367	0.0191143
hsa-miR-323a-3p	558.386	1.15429	0.448519	2.57356	0.0100657	0.0337208
hsa-miR-766-5p	35.5923	1.14762	0.471011	2.4365	0.0148302	0.0457999
hsa-miR-1468-5p	80.5144	1.13219	0.435446	2.60008	0.00932022	0.0315023
hsa-miR-199a-3p	107525	1.13149	0.283515	3.99095	6.58e-05	0.00062653
hsa-miR-199b-3p	107525	1.13149	0.283515	3.99095	6.58e-05	0.00062653
hsa-miR-98-5p	4704.29	1.11118	0.306957	3.61999	0.000294617	0.00200227
hsa-miR-199b-5p	5676.45	1.09311	0.358623	3.04807	0.00230318	0.0107314
hsa-miR-654-5p	257.449	1.0874	0.42341	2.56819	0.010223	0.0339283
hsa-miR-500a-5p	119.48	1.0839	0.379855	2.85347	0.00432451	0.0174198
hsa-miR-598-3p	493.791	1.07574	0.349617	3.0769	0.00209163	0.009897
hsa-miR-199a-5p	73958	1.06964	0.337194	3.17217	0.00151307	0.00752555
hsa-miR-574-5p	892.305	1.0686	0.326512	3.27277	0.00106499	0.0056817
hsa-let-7f-1-3p	161.309	1.06361	0.310488	3.4256	0.000613447	0.00368175
hsa-miR-424-5p	5715.4	1.06133	0.331965	3.19711	0.0013881	0.0071142
hsa-miR-324-5p	185.419	1.05949	0.317636	3.33557	0.000851254	0.00480576
hsa-miR-214-3p	3999.2	1.05426	0.296617	3.55427	0.000379027	0.0024627
hsa-let-7f-2-3p	102.195	1.04462	0.433727	2.40847	0.0160196	0.0489067
hsa-miR-22-3p	27890.4	1.03999	0.351169	2.96152	0.00306127	0.0133698
hsa-miR-494-3p	1944.5	1.03575	0.407318	2.54286	0.0109948	0.0356486
hsa-miR-584-5p	780.484	1.01643	0.342334	2.96911	0.00298663	0.0131747
hsa-miR-514a-5p	22475.8	1.01508	0.417321	2.43238	0.0149999	0.0461237
hsa-miR-202-5p	417348	1.01008	0.362529	2.78621	0.0053329	0.0204436
